# Supplementary material
Source: publisher figshare collection journal article supplement (https://acs.figshare.com/ndownloader/files/20168390)
Supplement: Supplementary file 1 [file 20168390]

## Sheet: global
CID:3385	hsa-mir-126	0.75702
CID:3385	hsa-let-7b	0.747019
CID:3385	hsa-mir-181a-1	0.743687
CID:3385	hsa-mir-143	0.732762
CID:3385	hsa-mir-181b-1	0.730535
CID:3385	hsa-mir-125b-2	0.729626
CID:3385	hsa-mir-125b-1	0.729496
CID:3385	hsa-mir-34a	0.72929
CID:3385	hsa-mir-145	0.724603
CID:3385	hsa-mir-181b-2	0.723387
CID:3385	hsa-mir-146a	0.722865
CID:3385	hsa-mir-181a-2	0.722572
CID:3385	hsa-mir-9-1	0.716488
CID:3385	hsa-let-7c	0.716054
CID:3385	hsa-mir-124-1	0.715833
CID:3385	hsa-mir-9-3	0.711898
CID:3385	hsa-mir-9-2	0.710799
CID:3385	hsa-mir-124-2	0.710596
CID:3385	hsa-mir-146b	0.708896
CID:3385	hsa-mir-221	0.70726
CID:3385	hsa-let-7i	0.702274
CID:3385	hsa-mir-124-3	0.702129
CID:3385	hsa-mir-155	0.701156
CID:3385	hsa-mir-223	0.700372
CID:3385	hsa-mir-34b	0.695531
CID:3385	hsa-mir-375	0.695017
CID:3385	hsa-mir-10b	0.694332
CID:3385	hsa-mir-19b-1	0.693914
CID:3385	hsa-mir-29c	0.693214
CID:3385	hsa-mir-205	0.693102
CID:3385	hsa-mir-22	0.692948
CID:3385	hsa-mir-150	0.690693
CID:3385	hsa-mir-107	0.690281
CID:3385	hsa-mir-142	0.689309
CID:3385	hsa-mir-26a-1	0.689246
CID:3385	hsa-mir-34c	0.687724
CID:3385	hsa-mir-200a	0.686222
CID:3385	hsa-mir-148a	0.685986
CID:3385	hsa-mir-195	0.682743
CID:3385	hsa-mir-30c-1	0.680288
CID:3385	hsa-mir-1-1	0.679835
CID:3385	hsa-mir-183	0.679663
CID:3385	hsa-mir-100	0.679537
CID:3385	hsa-mir-218-2	0.679406
CID:3385	hsa-mir-29b-1	0.679353
CID:3385	hsa-mir-26a-2	0.677088
CID:3385	hsa-mir-101-1	0.676077
CID:3385	hsa-mir-19b-2	0.674757
CID:3385	hsa-mir-30c-2	0.673327
CID:3385	hsa-mir-101-2	0.672189
CID:3385	hsa-mir-193b	0.670231
CID:3385	hsa-mir-193a	0.669563
CID:3385	hsa-mir-1-2	0.669504
CID:3385	hsa-mir-99a	0.668895
CID:3385	hsa-mir-218-1	0.668664
CID:3385	hsa-mir-214	0.668175
CID:3385	hsa-mir-196a-1	0.666126
CID:3385	hsa-mir-196a-2	0.665679
CID:3385	hsa-mir-133b	0.664964
CID:3385	hsa-mir-103a-1	0.66223
CID:3385	hsa-mir-29b-2	0.65994
CID:3385	hsa-mir-127	0.65977
CID:3385	hsa-mir-199b	0.659582
CID:3385	hsa-mir-138-1	0.658695
CID:3385	hsa-mir-20b	0.658447
CID:3385	hsa-mir-130a	0.653923
CID:451668	hsa-mir-146a	0.653192
CID:3385	hsa-mir-96	0.651381
CID:3229	hsa-mir-17	0.650398
CID:3385	hsa-mir-335	0.647459
CID:3385	hsa-mir-378a	0.644848
CID:3385	hsa-mir-194-1	0.641348
CID:3385	hsa-mir-138-2	0.640243
CID:3385	hsa-mir-302b	0.64013
CID:3385	hsa-mir-103a-2	0.638451
CID:3385	hsa-mir-18b	0.637479
CID:3229	hsa-mir-155	0.634724
CID:451668	hsa-mir-92a-1	0.633273
CID:3385	hsa-mir-99b	0.63301
CID:3385	hsa-mir-451a	0.631841
CID:3385	hsa-mir-122	0.630447
CID:3385	hsa-mir-30b	0.627889
CID:3385	hsa-mir-497	0.62779
CID:3229	hsa-mir-20a	0.62684
CID:3385	hsa-mir-302c	0.626495
CID:3385	hsa-mir-135a-1	0.624945
CID:451668	hsa-mir-18a	0.624211
CID:3385	hsa-mir-204	0.622758
CID:3385	hsa-mir-296	0.622561
CID:451668	hsa-mir-221	0.622519
CID:3385	hsa-mir-140	0.622114
CID:3385	hsa-mir-137	0.6211
CID:3385	hsa-mir-429	0.620856
CID:3385	hsa-mir-373	0.620676
CID:3229	hsa-mir-34a	0.620002
CID:3385	hsa-mir-302a	0.619793
CID:3229	hsa-mir-145	0.617899
CID:3385	hsa-mir-129-2	0.616269
CID:3385	hsa-mir-139	0.6159
CID:3385	hsa-mir-196b	0.615836
CID:3385	hsa-mir-192	0.615709
CID:451668	hsa-let-7a-1	0.615637
CID:448537	hsa-mir-24-1	0.614292
CID:3229	hsa-mir-92a-1	0.614263
CID:3385	hsa-mir-194-2	0.614185
CID:3385	hsa-mir-30d	0.613223
CID:451668	hsa-mir-143	0.612067
CID:3385	hsa-mir-206	0.609135
CID:3385	hsa-mir-130b	0.608959
CID:3385	hsa-mir-629	0.608115
CID:3385	hsa-mir-181d	0.60794
CID:3229	hsa-mir-221	0.607688
CID:3385	hsa-mir-328	0.607286
CID:451668	hsa-mir-19b-1	0.605427
CID:448537	hsa-let-7a-1	0.603779
CID:451668	hsa-let-7a-3	0.603173
CID:3385	hsa-mir-212	0.603091
CID:451668	hsa-let-7b	0.602537
CID:3385	hsa-mir-499a	0.602291
CID:3385	hsa-mir-98	0.602193
CID:3385	hsa-mir-338	0.601727
CID:451668	hsa-let-7a-2	0.600715
CID:3385	hsa-mir-542	0.599594
CID:451668	hsa-mir-222	0.598767
CID:3385	hsa-mir-92b	0.598425
CID:3385	hsa-mir-708	0.595219
CID:448537	hsa-let-7b	0.594847
CID:3385	hsa-mir-625	0.594592
CID:448537	hsa-mir-27a	0.592146
CID:448537	hsa-let-7a-2	0.591759
CID:448537	hsa-mir-124-1	0.591678
CID:451668	hsa-mir-223	0.591651
CID:448537	hsa-mir-181b-1	0.591322
CID:451668	hsa-mir-200b	0.590913
CID:451668	hsa-mir-29c	0.590337
CID:3229	hsa-mir-15a	0.590063
CID:3229	hsa-mir-29a	0.589898
CID:448537	hsa-let-7a-3	0.589393
CID:448537	hsa-mir-200c	0.589221
CID:451668	hsa-mir-92a-2	0.58885
CID:448537	hsa-mir-143	0.588484
CID:448537	hsa-mir-124-2	0.588231
CID:3229	hsa-mir-19a	0.587489
CID:448537	hsa-mir-181b-2	0.587333
CID:451668	hsa-mir-1-1	0.586895
CID:5757	hsa-mir-24-1	0.586512
CID:451668	hsa-mir-181b-1	0.58614
CID:448537	hsa-mir-92a-2	0.585581
CID:3229	hsa-mir-19b-1	0.585462
CID:3229	hsa-mir-222	0.585328
CID:448537	hsa-mir-210	0.585263
CID:448537	hsa-mir-200b	0.585145
CID:5757	hsa-mir-16-1	0.58512
CID:448537	hsa-mir-124-3	0.584332
CID:3385	hsa-mir-302d	0.582761
CID:3229	hsa-mir-24-1	0.582293
CID:3385	hsa-mir-452	0.582241
CID:3229	hsa-mir-200b	0.582102
CID:448537	hsa-mir-182	0.581858
CID:448537	hsa-mir-181a-2	0.58152
CID:448537	hsa-mir-30a	0.581509
CID:448537	hsa-let-7e	0.581447
CID:3385	hsa-mir-186	0.580994
CID:3229	hsa-mir-210	0.580983
CID:3385	hsa-mir-28	0.580776
CID:451668	hsa-mir-200c	0.580554
CID:451668	hsa-let-7c	0.579571
CID:5757	hsa-mir-181a-1	0.579551
CID:451668	hsa-mir-9-1	0.579058
CID:5757	hsa-mir-16-2	0.578308
CID:448537	hsa-let-7d	0.577813
CID:3229	hsa-let-7c	0.577742
CID:451668	hsa-mir-199a-2	0.577695
CID:448537	hsa-mir-18a	0.577693
CID:451668	hsa-mir-199a-1	0.577157
CID:3385	hsa-mir-219-1	0.576901
CID:451668	hsa-mir-1-2	0.576271
CID:448537	hsa-mir-125a	0.575905
CID:448537	hsa-mir-125b-2	0.575899
CID:451668	hsa-mir-181b-2	0.575884
CID:3385	hsa-mir-424	0.575855
CID:451668	hsa-mir-146b	0.575617
CID:451668	hsa-let-7e	0.575536
CID:3229	hsa-mir-223	0.575466
CID:3229	hsa-mir-200c	0.574825
CID:3385	hsa-mir-345	0.574698
CID:448537	hsa-mir-10b	0.574603
CID:448537	hsa-mir-24-2	0.574603
CID:448537	hsa-mir-27b	0.574573
CID:451668	hsa-mir-150	0.574425
CID:3385	hsa-mir-144	0.574199
CID:3229	hsa-mir-92a-2	0.574056
CID:3229	hsa-let-7e	0.574038
CID:3385	hsa-mir-211	0.573674
CID:3385	hsa-mir-367	0.572886
CID:5757	hsa-mir-145	0.572868
CID:448537	hsa-mir-145	0.572701
CID:448537	hsa-mir-31	0.572333
CID:3385	hsa-mir-372	0.571746
CID:448537	hsa-mir-125b-1	0.571668
CID:448537	hsa-mir-7-1	0.571647
CID:60750	hsa-mir-126	0.571513
CID:3385	hsa-mir-449a	0.571455
CID:3385	hsa-mir-339	0.571408
CID:5757	hsa-mir-20a	0.571047
CID:451668	hsa-mir-9-2	0.570965
CID:5311	hsa-let-7a-1	0.570758
CID:3385	hsa-mir-409	0.57064
CID:448537	hsa-let-7g	0.570084
CID:3229	hsa-mir-1-1	0.569756
CID:451668	hsa-mir-30a	0.569201
CID:448537	hsa-let-7c	0.568957
CID:448537	hsa-mir-23b	0.568885
CID:5757	hsa-mir-125b-1	0.568837
CID:5757	hsa-mir-210	0.568782
CID:451668	hsa-mir-142	0.568702
CID:448537	hsa-mir-34b	0.568556
CID:448537	hsa-mir-107	0.568205
CID:451668	hsa-mir-124-1	0.568196
CID:448537	hsa-mir-19a	0.568193
CID:5757	hsa-mir-34a	0.568044
CID:5311	hsa-mir-181a-1	0.567968
CID:3385	hsa-mir-215	0.567961
CID:5757	hsa-mir-92a-1	0.567784
CID:5757	hsa-mir-125b-2	0.567527
CID:448537	hsa-mir-205	0.56748
CID:3385	hsa-mir-181c	0.567276
CID:451668	hsa-mir-9-3	0.56711
CID:448537	hsa-mir-7-2	0.566866
CID:5757	hsa-mir-221	0.566756
CID:3229	hsa-mir-9-1	0.566734
CID:5757	hsa-mir-181b-1	0.566516
CID:60750	hsa-mir-17	0.566222
CID:451668	hsa-let-7d	0.56613
CID:5311	hsa-mir-27a	0.56596
CID:3229	hsa-let-7d	0.565927
CID:3229	hsa-mir-106b	0.565019
CID:5311	hsa-mir-181b-1	0.56465
CID:3385	hsa-mir-494	0.563932
CID:5757	hsa-mir-181a-2	0.563597
CID:3385	hsa-mir-370	0.563374
CID:451668	hsa-mir-15b	0.56314
CID:451668	hsa-mir-200a	0.562656
CID:3229	hsa-mir-146b	0.562645
CID:451668	hsa-mir-34c	0.562639
CID:448537	hsa-mir-30c-1	0.562484
CID:448537	hsa-mir-7-3	0.562232
CID:3229	hsa-let-7g	0.562083
CID:60750	hsa-let-7a-2	0.561967
CID:448537	hsa-mir-183	0.561951
CID:448537	hsa-mir-486	0.561859
CID:448537	hsa-mir-222	0.561855
CID:451668	hsa-mir-124-2	0.561695
CID:448537	hsa-let-7f-1	0.561648
CID:448537	hsa-mir-218-1	0.561444
CID:448537	hsa-mir-148a	0.561395
CID:448537	hsa-let-7i	0.561102
CID:5757	hsa-mir-222	0.560658
CID:5757	hsa-mir-181b-2	0.560642
CID:5311	hsa-mir-181b-2	0.56062
CID:5311	hsa-mir-16-1	0.560596
CID:448537	hsa-mir-146a	0.560202
CID:451668	hsa-mir-19b-2	0.560107
CID:3229	hsa-mir-182	0.560063
CID:60750	hsa-let-7a-3	0.559688
CID:3229	hsa-mir-9-2	0.5594
CID:5311	hsa-let-7a-2	0.55933
CID:5311	hsa-mir-200c	0.558774
CID:5311	hsa-mir-143	0.558149
CID:3229	hsa-mir-150	0.558075
CID:3229	hsa-mir-1-2	0.557837
CID:448537	hsa-mir-199a-2	0.557677
CID:3229	hsa-mir-142	0.556905
CID:448537	hsa-mir-223	0.556575
CID:5311	hsa-let-7a-3	0.556402
CID:5311	hsa-mir-210	0.556394
CID:448537	hsa-mir-193a	0.555942
CID:5757	hsa-mir-31	0.555912
CID:3385	hsa-mir-301a	0.55591
CID:451668	hsa-mir-23a	0.555633
CID:5311	hsa-mir-30a	0.555567
CID:5757	hsa-mir-18a	0.555309
CID:448537	hsa-mir-34c	0.555281
CID:3229	hsa-mir-9-3	0.555211
CID:448537	hsa-mir-193b	0.555172
CID:451668	hsa-mir-34b	0.55506
CID:448537	hsa-mir-30c-2	0.554786
CID:3229	hsa-let-7f-1	0.554572
CID:3385	hsa-mir-337	0.554264
CID:448537	hsa-mir-200a	0.554196
CID:3229	hsa-mir-200a	0.554083
CID:5311	hsa-mir-23a	0.554053
CID:5311	hsa-mir-16-2	0.553935
CID:5757	hsa-mir-182	0.553855
CID:3385	hsa-mir-324	0.55371
CID:60750	hsa-mir-16-2	0.553426
CID:451668	hsa-mir-7-1	0.553356
CID:448537	hsa-mir-199a-1	0.553282
CID:448537	hsa-mir-142	0.553274
CID:448537	hsa-mir-99a	0.553021
CID:448537	hsa-mir-132	0.552958
CID:448537	hsa-mir-221	0.552824
CID:448537	hsa-mir-100	0.552749
CID:448537	hsa-mir-101-1	0.552722
CID:451668	hsa-mir-205	0.552695
CID:451668	hsa-mir-133a-1	0.552428
CID:448537	hsa-mir-19b-1	0.55228
CID:5757	hsa-mir-30a	0.552247
CID:448537	hsa-mir-29c	0.552096
CID:60750	hsa-mir-143	0.552025
CID:3229	hsa-mir-15b	0.552009
CID:5311	hsa-let-7e	0.55138
CID:5757	hsa-mir-155	0.55108
CID:5311	hsa-mir-181a-2	0.550917
CID:5311	hsa-mir-24-2	0.550688
CID:5757	hsa-mir-15a	0.550615
CID:5311	hsa-mir-10b	0.550498
CID:5311	hsa-mir-125a	0.550276
CID:3229	hsa-mir-34c	0.550256
CID:5757	hsa-mir-92a-2	0.55007
CID:5311	hsa-let-7d	0.550021
CID:451668	hsa-mir-133b	0.549812
CID:448537	hsa-mir-101-2	0.549798
CID:5757	hsa-mir-24-2	0.549765
CID:5311	hsa-mir-27b	0.549604
CID:60750	hsa-mir-92a-1	0.549592
CID:5311	hsa-mir-106b	0.549495
CID:3385	hsa-mir-449b	0.54941
CID:5757	hsa-mir-223	0.549406
CID:5757	hsa-mir-125a	0.549208
CID:448537	hsa-mir-128-2	0.549167
CID:448537	hsa-mir-150	0.549053
CID:451668	hsa-mir-7-2	0.549003
CID:3385	hsa-mir-32	0.548408
CID:5311	hsa-mir-146b	0.548207
CID:451668	hsa-mir-26a-1	0.548096
CID:5311	hsa-mir-218-2	0.548026
CID:448537	hsa-mir-135b	0.547989
CID:60750	hsa-mir-34a	0.547898
CID:451668	hsa-mir-195	0.547881
CID:448537	hsa-mir-103a-1	0.547385
CID:5757	hsa-mir-375	0.547183
CID:448537	hsa-mir-127	0.547147
CID:451668	hsa-mir-133a-2	0.547145
CID:448537	hsa-mir-141	0.547049
CID:3385	hsa-mir-520d	0.547024
CID:5757	hsa-mir-106b	0.54687
CID:5757	hsa-mir-146b	0.546768
CID:60750	hsa-mir-210	0.546663
CID:60750	hsa-let-7e	0.546616
CID:60750	hsa-mir-20a	0.546036
CID:448537	hsa-mir-224	0.546029
CID:448537	hsa-mir-199b	0.546009
CID:448537	hsa-mir-191	0.545814
CID:5311	hsa-mir-7-1	0.545693
CID:3229	hsa-mir-24-2	0.545583
CID:60750	hsa-mir-145	0.545543
CID:5311	hsa-mir-23b	0.545392
CID:60750	hsa-mir-146a	0.545282
CID:3385	hsa-mir-153-2	0.545089
CID:3229	hsa-mir-34b	0.545011
CID:448537	hsa-mir-19b-2	0.544967
CID:5311	hsa-mir-20a	0.544958
CID:60750	hsa-mir-200c	0.544821
CID:5311	hsa-mir-107	0.544801
CID:60750	hsa-mir-200b	0.544776
CID:448537	hsa-mir-29a	0.54462
CID:60750	hsa-mir-125b-2	0.544382
CID:5757	hsa-mir-19a	0.544368
CID:451668	hsa-mir-124-3	0.544269
CID:5311	hsa-mir-375	0.54424
CID:60750	hsa-mir-125b-1	0.544078
CID:5757	hsa-mir-29c	0.543894
CID:3229	hsa-mir-19b-2	0.543818
CID:448537	hsa-mir-96	0.543401
CID:451668	hsa-mir-375	0.543318
CID:448537	hsa-mir-21	0.543264
CID:5757	hsa-mir-205	0.543255
CID:5311	hsa-mir-31	0.5432
CID:451668	hsa-mir-7-3	0.543188
CID:5311	hsa-let-7g	0.54285
CID:3229	hsa-mir-27a	0.542726
CID:5311	hsa-mir-34b	0.542687
CID:60750	hsa-mir-124-1	0.542661
CID:5757	hsa-mir-142	0.542196
CID:448537	hsa-mir-342	0.542083
CID:448537	hsa-mir-130a	0.542052
CID:451668	hsa-mir-106a	0.541981
CID:3385	hsa-mir-381	0.541749
CID:5311	hsa-mir-125b-2	0.541648
CID:5311	hsa-mir-18a	0.541462
CID:5311	hsa-mir-7-2	0.541316
CID:5311	hsa-mir-93	0.541307
CID:448537	hsa-mir-214	0.541305
CID:451668	hsa-mir-100	0.541164
CID:3385	hsa-mir-330	0.540967
CID:60750	hsa-mir-9-1	0.540859
CID:5311	hsa-mir-145	0.540444
CID:451668	hsa-mir-141	0.540307
CID:448537	hsa-mir-302b	0.540253
CID:5311	hsa-mir-205	0.540017
CID:5311	hsa-mir-25	0.539985
CID:5757	hsa-mir-29a	0.539956
CID:451668	hsa-mir-26a-2	0.539839
CID:5757	hsa-mir-199a-2	0.539708
CID:5311	hsa-let-7c	0.539647
CID:448537	hsa-mir-638	0.539227
CID:5311	hsa-mir-218-1	0.538834
CID:5311	hsa-mir-15b	0.538567
CID:5757	hsa-mir-26a-1	0.538498
CID:3385	hsa-mir-134	0.538449
CID:5311	hsa-mir-486	0.5381
CID:60750	hsa-mir-9-3	0.538065
CID:60750	hsa-mir-124-2	0.538053
CID:60750	hsa-mir-23a	0.537577
CID:448537	hsa-mir-149	0.537532
CID:5757	hsa-mir-199a-1	0.537532
CID:60750	hsa-mir-30a	0.537519
CID:3229	hsa-mir-375	0.53706
CID:5757	hsa-mir-100	0.536985
CID:3385	hsa-mir-491	0.536933
CID:451668	hsa-mir-148a	0.536909
CID:451668	hsa-mir-183	0.536874
CID:3229	hsa-mir-214	0.536855
CID:451668	hsa-mir-196a-2	0.536794
CID:60750	hsa-let-7g	0.536706
CID:5757	hsa-mir-34c	0.536663
CID:60750	hsa-mir-9-2	0.536659
CID:451668	hsa-mir-10b	0.536643
CID:5311	hsa-mir-7-3	0.536629
CID:5311	hsa-mir-125b-1	0.536088
CID:3385	hsa-mir-376a-1	0.536046
CID:60750	hsa-mir-92a-2	0.536025
CID:451668	hsa-mir-101-1	0.535982
CID:5757	hsa-mir-7-1	0.535972
CID:60750	hsa-mir-182	0.535835
CID:5757	hsa-mir-106a	0.535623
CID:5757	hsa-mir-22	0.535325
CID:60750	hsa-mir-221	0.53524
CID:5311	hsa-mir-148a	0.535135
CID:3385	hsa-mir-376a-2	0.5351
CID:3385	hsa-mir-95	0.535049
CID:60750	hsa-mir-222	0.534991
CID:448537	hsa-mir-29b-1	0.534914
CID:60750	hsa-mir-24-2	0.534796
CID:60750	hsa-mir-31	0.53479
CID:5311	hsa-mir-19a	0.534492
CID:5311	hsa-mir-193a	0.534376
CID:448537	hsa-mir-138-2	0.534036
CID:60750	hsa-mir-18a	0.533991
CID:5311	hsa-mir-195	0.533794
CID:5311	hsa-let-7f-1	0.533704
CID:3229	hsa-mir-133b	0.53351
CID:5311	hsa-let-7i	0.533437
CID:3229	hsa-mir-100	0.533426
CID:3229	hsa-mir-195	0.533423
CID:5311	hsa-mir-26a-1	0.533295
CID:5311	hsa-mir-15a	0.533285
CID:3229	hsa-mir-141	0.533153
CID:60750	hsa-let-7i	0.533046
CID:60750	hsa-mir-146b	0.532983
CID:5757	hsa-mir-19b-1	0.53286
CID:3229	hsa-mir-106a	0.532749
CID:60750	hsa-mir-124-3	0.532702
CID:448537	hsa-mir-1-1	0.53262
CID:5311	hsa-mir-222	0.532372
CID:5757	hsa-mir-150	0.532257
CID:5757	hsa-mir-148a	0.532161
CID:3385	hsa-mir-148b	0.532075
CID:5311	hsa-mir-320a	0.531983
CID:448537	hsa-mir-155	0.531882
CID:5757	hsa-mir-7-2	0.531814
CID:5311	hsa-mir-30c-2	0.531716
CID:448537	hsa-mir-151a	0.531706
CID:448537	hsa-mir-18b	0.531595
CID:448537	hsa-mir-133b	0.531565
CID:448537	hsa-mir-197	0.531328
CID:3385	hsa-mir-208a	0.531241
CID:5311	hsa-mir-199a-2	0.531238
CID:60750	hsa-mir-106b	0.531088
CID:3229	hsa-mir-107	0.5309
CID:3229	hsa-mir-10b	0.530814
CID:5757	hsa-mir-486	0.530691
CID:5757	hsa-mir-183	0.530647
CID:60750	hsa-let-7f-1	0.530486
CID:3229	hsa-mir-133a-1	0.530445
CID:3229	hsa-mir-27b	0.530213
CID:60750	hsa-mir-125a	0.52988
CID:60750	hsa-mir-15a	0.529634
CID:3385	hsa-mir-326	0.529449
CID:5311	hsa-mir-99a	0.529391
CID:5311	hsa-mir-138-1	0.529307
CID:5757	hsa-mir-218-2	0.529219
CID:5757	hsa-mir-195	0.529089
CID:5311	hsa-mir-34c	0.528979
CID:5757	hsa-mir-26a-2	0.528959
CID:448537	hsa-mir-302c	0.528947
CID:451668	hsa-mir-486	0.528694
CID:448537	hsa-mir-99b	0.528633
CID:3385	hsa-mir-371a	0.528579
CID:448537	hsa-mir-103a-2	0.528573
CID:60750	hsa-mir-223	0.528445
CID:5311	hsa-mir-100	0.528434
CID:3229	hsa-mir-183	0.528331
CID:5311	hsa-mir-146a	0.528236
CID:451668	hsa-mir-101-2	0.528015
CID:5311	hsa-mir-128-2	0.527978
CID:3229	hsa-mir-148a	0.527905
CID:448537	hsa-mir-135a-1	0.527724
CID:448537	hsa-mir-378a	0.527681
CID:5311	hsa-mir-135b	0.527404
CID:5757	hsa-mir-29b-1	0.5274
CID:5311	hsa-mir-223	0.527272
CID:5757	hsa-mir-141	0.527116
CID:5311	hsa-mir-199a-1	0.527037
CID:5757	hsa-mir-7-3	0.527001
CID:5311	hsa-mir-29c	0.526707
CID:5311	hsa-mir-103a-1	0.526549
CID:3229	hsa-mir-196a-2	0.526372
CID:60750	hsa-mir-29a	0.526332
CID:3229	hsa-mir-23b	0.526247
CID:60750	hsa-mir-19a	0.526126
CID:60750	hsa-mir-15b	0.526117
CID:60750	hsa-mir-34b	0.526102
CID:3385	hsa-mir-425	0.526101
CID:60750	hsa-mir-10b	0.525934
CID:5757	hsa-mir-93	0.525914
CID:60750	hsa-mir-375	0.525859
CID:3229	hsa-mir-133a-2	0.52577
CID:5311	hsa-mir-142	0.525741
CID:5311	hsa-mir-20b	0.525532
CID:60750	hsa-mir-23b	0.525403
CID:60750	hsa-mir-199a-1	0.525248
CID:60750	hsa-mir-29c	0.524925
CID:5311	hsa-mir-101-1	0.524789
CID:5311	hsa-mir-200a	0.524762
CID:60750	hsa-mir-22	0.524759
CID:448537	hsa-mir-1-2	0.524714
CID:451668	hsa-mir-132	0.524403
CID:60750	hsa-mir-27b	0.524285
CID:5757	hsa-mir-25	0.524008
CID:451668	hsa-mir-122	0.523974
CID:5311	hsa-mir-199b	0.523728
CID:60750	hsa-mir-107	0.523655
CID:5311	hsa-mir-196a-1	0.523549
CID:5311	hsa-mir-191	0.523542
CID:5757	hsa-mir-101-1	0.523348
CID:5311	hsa-mir-224	0.523338
CID:5311	hsa-mir-26a-2	0.523332
CID:5757	hsa-mir-99a	0.523134
CID:448537	hsa-mir-128-1	0.52241
CID:448537	hsa-mir-139	0.522213
CID:5757	hsa-mir-193a	0.522143
CID:60750	hsa-mir-7-1	0.522119
CID:5757	hsa-mir-132	0.5221
CID:3385	hsa-mir-520h	0.521917
CID:5311	hsa-mir-638	0.521882
CID:3385	hsa-mir-383	0.521831
CID:5311	hsa-mir-101-2	0.521634
CID:5757	hsa-mir-196a-1	0.521599
CID:5757	hsa-mir-214	0.521475
CID:448537	hsa-mir-204	0.521274
CID:5311	hsa-mir-221	0.521066
CID:5757	hsa-mir-196a-2	0.521028
CID:60750	hsa-mir-106a	0.520825
CID:448537	hsa-mir-129-2	0.520807
CID:3229	hsa-mir-93	0.520788
CID:448537	hsa-mir-302a	0.520652
CID:5757	hsa-mir-218-1	0.520651
CID:448537	hsa-mir-296	0.520646
CID:3385	hsa-mir-129-1	0.520418
CID:448537	hsa-mir-140	0.520306
CID:3385	hsa-mir-184	0.520115
CID:5757	hsa-mir-193b	0.520091
CID:5757	hsa-mir-101-2	0.519926
CID:5311	hsa-mir-150	0.519887
CID:5311	hsa-mir-130a	0.519872
CID:448537	hsa-mir-29b-2	0.519752
CID:448537	hsa-mir-137	0.519633
CID:5311	hsa-mir-302b	0.519493
CID:60750	hsa-mir-34c	0.519353
CID:448537	hsa-mir-451a	0.519222
CID:5757	hsa-mir-133b	0.519062
CID:3229	hsa-mir-486	0.51903
CID:5311	hsa-mir-335	0.518746
CID:60750	hsa-mir-486	0.518518
CID:3385	hsa-mir-299	0.518315
CID:60750	hsa-mir-7-2	0.518198
CID:5311	hsa-mir-141	0.518036
CID:60750	hsa-mir-142	0.517889
CID:5311	hsa-mir-342	0.51781
CID:3229	hsa-mir-22	0.517428
CID:5311	hsa-mir-19b-1	0.517131
CID:60750	hsa-mir-148a	0.51704
CID:60750	hsa-mir-1-1	0.516986
CID:5311	hsa-mir-149	0.516922
CID:448537	hsa-mir-10a	0.516687
CID:5311	hsa-mir-29a	0.516534
CID:60750	hsa-mir-150	0.516243
CID:448537	hsa-mir-629	0.5162
CID:5757	hsa-mir-19b-2	0.516181
CID:60750	hsa-mir-200a	0.515744
CID:60750	hsa-mir-218-2	0.51558
CID:60750	hsa-mir-195	0.515336
CID:5311	hsa-mir-152	0.515168
CID:5757	hsa-mir-127	0.515115
CID:5311	hsa-mir-214	0.514984
CID:60750	hsa-mir-100	0.514975
CID:5311	hsa-mir-19b-2	0.514948
CID:448537	hsa-mir-26b	0.514856
CID:3385	hsa-mir-376c	0.514571
CID:5311	hsa-mir-194-1	0.514058
CID:5757	hsa-mir-138-1	0.513985
CID:60750	hsa-mir-7-3	0.513969
CID:60750	hsa-mir-93	0.513881
CID:60750	hsa-mir-19b-1	0.513618
CID:60750	hsa-mir-29b-1	0.513583
CID:3229	hsa-mir-132	0.513425
CID:451668	hsa-mir-196a-1	0.513321
CID:60750	hsa-mir-183	0.513277
CID:5311	hsa-mir-196a-2	0.513015
CID:451668	hsa-mir-30c-1	0.512715
CID:5757	hsa-mir-199b	0.512392
CID:451668	hsa-mir-30c-2	0.512335
CID:448537	hsa-mir-30d	0.512235
CID:60750	hsa-mir-30c-1	0.512063
CID:448537	hsa-mir-429	0.511994
CID:60750	hsa-mir-25	0.511898
CID:60750	hsa-mir-26a-2	0.511763
CID:5757	hsa-mir-29b-2	0.511629
CID:3385	hsa-mir-187	0.511344
CID:5311	hsa-mir-138-2	0.511292
CID:5311	hsa-mir-151a	0.511267
CID:3229	hsa-mir-25	0.511222
CID:3385	hsa-mir-216a	0.510444
CID:451668	hsa-mir-99a	0.510394
CID:448537	hsa-mir-542	0.51024
CID:451668	hsa-mir-218-2	0.50986
CID:448537	hsa-mir-30e	0.509473
CID:451668	hsa-mir-199b	0.50938
CID:448537	hsa-mir-574	0.509034
CID:5311	hsa-mir-302c	0.508748
CID:448537	hsa-mir-30b	0.508655
CID:60750	hsa-mir-193a	0.508592
CID:5311	hsa-mir-29b-1	0.508569
CID:5311	hsa-mir-103a-2	0.508505
CID:5757	hsa-mir-20b	0.508234
CID:5311	hsa-mir-133b	0.508159
CID:5757	hsa-mir-130a	0.508045
CID:5311	hsa-mir-135a-1	0.507983
CID:5311	hsa-mir-1-1	0.50773
CID:60750	hsa-mir-193b	0.507662
CID:3385	hsa-mir-650	0.507649
CID:5311	hsa-mir-18b	0.507468
CID:3229	hsa-mir-196a-1	0.507458
CID:60750	hsa-mir-218-1	0.507266
CID:448537	hsa-mir-328	0.507072
CID:60750	hsa-mir-30c-2	0.506901
CID:5311	hsa-mir-497	0.506873
CID:5757	hsa-mir-96	0.50675
CID:448537	hsa-mir-122	0.506483
CID:5757	hsa-mir-135b	0.506172
CID:448537	hsa-mir-196b	0.505886
CID:5311	hsa-mir-21	0.505753
CID:3229	hsa-mir-103a-1	0.505603
CID:60750	hsa-mir-101-1	0.505139
CID:5757	hsa-mir-224	0.504847
CID:448537	hsa-mir-133a-1	0.504759
CID:60750	hsa-mir-133b	0.504672
CID:60750	hsa-mir-19b-2	0.504557
CID:3229	hsa-mir-218-2	0.504504
CID:451668	hsa-mir-127	0.504393
CID:60750	hsa-mir-214	0.504372
CID:60750	hsa-mir-141	0.504262
CID:448537	hsa-mir-338	0.504236
CID:3385	hsa-mir-363	0.503867
CID:448537	hsa-mir-212	0.503854
CID:5311	hsa-mir-139	0.503528
CID:5311	hsa-mir-378a	0.503458
CID:3229	hsa-mir-30c-1	0.503295
CID:5757	hsa-mir-152	0.503253
CID:60750	hsa-mir-196a-2	0.50319
CID:5311	hsa-mir-128-1	0.503189
CID:60750	hsa-mir-196a-1	0.503111
CID:60750	hsa-mir-99a	0.502893
CID:3229	hsa-mir-30c-2	0.502669
CID:60750	hsa-mir-103a-1	0.502562
CID:451668	hsa-mir-138-1	0.502471
CID:60750	hsa-mir-101-2	0.502025
CID:5311	hsa-mir-296	0.501979
CID:451668	hsa-mir-218-1	0.501949
CID:451668	hsa-mir-342	0.501135
CID:448537	hsa-mir-192	0.501103
CID:3385	hsa-mir-520a	0.500923
CID:5311	hsa-mir-204	0.500802
CID:5311	hsa-mir-1-2	0.5008
CID:5757	hsa-mir-335	0.500748
CID:3385	hsa-mir-361	0.500645
CID:5757	hsa-mir-133a-1	0.500614
CID:3385	hsa-mir-513a-1	0.500308
CID:3385	hsa-mir-513a-2	0.500198
CID:60750	hsa-mir-127	0.500179
CID:5757	hsa-mir-191	0.500175
CID:451668	hsa-mir-103a-2	0.500128
CID:60750	hsa-mir-199b	0.500093
CID:5311	hsa-mir-137	0.499952
CID:5757	hsa-mir-138-2	0.49989
CID:451668	hsa-mir-96	0.499752
CID:5757	hsa-mir-342	0.499442
CID:3229	hsa-mir-20b	0.499371
CID:448537	hsa-mir-133a-2	0.498756
CID:5757	hsa-mir-194-1	0.498651
CID:5311	hsa-mir-302a	0.498533
CID:5757	hsa-mir-320a	0.498442
CID:60750	hsa-mir-29b-2	0.498429
CID:451668	hsa-mir-335	0.498295
CID:451668	hsa-mir-206	0.498275
CID:5757	hsa-mir-378a	0.498055
CID:3229	hsa-mir-138-1	0.497971
CID:60750	hsa-mir-138-1	0.497867
CID:451668	hsa-mir-224	0.497508
CID:60750	hsa-mir-20b	0.497197
CID:5757	hsa-mir-149	0.497174
CID:5311	hsa-mir-373	0.496683
CID:448537	hsa-mir-708	0.496568
CID:3229	hsa-mir-378a	0.496535
CID:3229	hsa-mir-127	0.496524
CID:5757	hsa-mir-103a-2	0.496459
CID:448537	hsa-mir-499a	0.496428
CID:3229	hsa-mir-218-1	0.496253
CID:60750	hsa-mir-130a	0.496175
CID:5311	hsa-mir-451a	0.496165
CID:5311	hsa-mir-10a	0.495709
CID:448537	hsa-mir-302d	0.495673
CID:3385	hsa-mir-154	0.495478
CID:3385	hsa-mir-520b	0.495474
CID:5757	hsa-mir-133a-2	0.495367
CID:60750	hsa-mir-135b	0.495301
CID:451668	hsa-mir-192	0.494949
CID:451668	hsa-mir-128-2	0.494924
CID:3385	hsa-mir-432	0.494892
CID:448537	hsa-mir-452	0.494624
CID:5311	hsa-mir-30d	0.494601
CID:448537	hsa-mir-185	0.494398
CID:60750	hsa-mir-224	0.494037
CID:451668	hsa-mir-138-2	0.493944
CID:448537	hsa-mir-98	0.493817
CID:5311	hsa-mir-29b-2	0.49363
CID:5757	hsa-mir-151a	0.493328
CID:5311	hsa-mir-194-2	0.493214
CID:60750	hsa-mir-96	0.493024
CID:448537	hsa-mir-186	0.49249
CID:448537	hsa-mir-206	0.492099
CID:5311	hsa-mir-130b	0.492079
CID:5311	hsa-mir-92b	0.491788
CID:5757	hsa-mir-99b	0.491719
CID:451668	hsa-mir-451a	0.491659
CID:60750	hsa-mir-335	0.491643
CID:5311	hsa-mir-181d	0.491435
CID:3229	hsa-mir-130a	0.491193
CID:5311	hsa-mir-26b	0.490991
CID:3385	hsa-mir-493	0.490718
CID:5757	hsa-mir-18b	0.49053
CID:60750	hsa-mir-191	0.490514
CID:5757	hsa-mir-197	0.490447
CID:5311	hsa-mir-328	0.48933
CID:3229	hsa-mir-224	0.48927
CID:448537	hsa-mir-365a	0.489203
CID:3385	hsa-mir-520c	0.489105
CID:3229	hsa-mir-138-2	0.488577
CID:448537	hsa-mir-367	0.488139
CID:3229	hsa-mir-103a-2	0.487974
CID:60750	hsa-mir-152	0.48794
CID:5757	hsa-mir-497	0.487633
CID:3229	hsa-mir-335	0.487529
CID:3229	hsa-mir-342	0.487274
CID:3385	hsa-mir-340	0.487087
CID:451668	hsa-mir-26b	0.487083
CID:5311	hsa-mir-625	0.48653
CID:5311	hsa-mir-429	0.486514
CID:3229	hsa-mir-192	0.4864
CID:5311	hsa-mir-212	0.486355
CID:448537	hsa-mir-211	0.486347
CID:448537	hsa-mir-219-1	0.486263
CID:5311	hsa-mir-30b	0.486181
CID:60750	hsa-mir-302b	0.486091
CID:3385	hsa-mir-153-1	0.48607
CID:5757	hsa-mir-451a	0.485793
CID:3385	hsa-mir-495	0.485372
CID:5757	hsa-mir-135a-1	0.485324
CID:60750	hsa-mir-378a	0.485293
CID:5757	hsa-mir-429	0.485166
CID:60750	hsa-mir-133a-2	0.485105
CID:5757	hsa-mir-302c	0.484674
CID:60750	hsa-mir-103a-2	0.484594
CID:5757	hsa-mir-204	0.48444
CID:3385	hsa-mir-219-2	0.484311
CID:3385	hsa-mir-362	0.484236
CID:5757	hsa-mir-192	0.483965
CID:3385	hsa-mir-190a	0.483894
CID:60750	hsa-mir-138-2	0.483628
CID:5311	hsa-mir-133a-1	0.483544
CID:5311	hsa-mir-338	0.483531
CID:5757	hsa-mir-26b	0.483083
CID:448537	hsa-mir-339	0.482977
CID:5757	hsa-mir-10a	0.482844
CID:451668	hsa-mir-152	0.482754
CID:448537	hsa-mir-663a	0.482554
CID:60750	hsa-mir-151a	0.482427
CID:3229	hsa-mir-30b	0.482132
CID:3385	hsa-mir-488	0.482079
CID:451668	hsa-mir-429	0.482043
CID:448537	hsa-mir-215	0.481943
CID:5311	hsa-mir-196b	0.481803
CID:448537	hsa-mir-423	0.481504
CID:5757	hsa-mir-122	0.48138
CID:3229	hsa-mir-206	0.481292
CID:60750	hsa-mir-99b	0.481138
CID:5757	hsa-mir-137	0.480926
CID:451668	hsa-mir-135b	0.480284
CID:60750	hsa-mir-451a	0.480241
CID:5311	hsa-mir-122	0.480188
CID:448537	hsa-mir-449a	0.479818
CID:3229	hsa-mir-451a	0.479591
CID:3385	hsa-mir-198	0.479115
CID:451668	hsa-mir-18b	0.479085
CID:5757	hsa-mir-296	0.478703
CID:60750	hsa-mir-18b	0.478561
CID:448537	hsa-mir-144	0.478271
CID:5311	hsa-mir-185	0.478186
CID:5311	hsa-mir-302d	0.47776
CID:448537	hsa-mir-28	0.477595
CID:60750	hsa-mir-638	0.477446
CID:5757	hsa-mir-140	0.477322
CID:5757	hsa-mir-194-2	0.477309
CID:60750	hsa-mir-497	0.477249
CID:5311	hsa-mir-452	0.477216
CID:3229	hsa-mir-26b	0.477184
CID:5311	hsa-mir-133a-2	0.477166
CID:5311	hsa-mir-499a	0.477084
CID:448537	hsa-mir-372	0.477011
CID:451668	hsa-mir-137	0.476806
CID:448537	hsa-mir-424	0.476562
CID:60750	hsa-mir-302c	0.476514
CID:5757	hsa-mir-373	0.476434
CID:5757	hsa-mir-302a	0.476328
CID:5311	hsa-mir-708	0.476326
CID:5311	hsa-mir-186	0.476275
CID:3229	hsa-mir-429	0.476062
CID:451668	hsa-mir-194-1	0.475907
CID:5311	hsa-mir-192	0.475663
CID:60750	hsa-mir-135a-1	0.475647
CID:3385	hsa-mir-608	0.475436
CID:3229	hsa-mir-135b	0.475116
CID:451668	hsa-mir-149	0.475101
CID:451668	hsa-mir-151a	0.474692
CID:3229	hsa-mir-18b	0.474375
CID:5757	hsa-mir-196b	0.47395
CID:60750	hsa-mir-122	0.473501
CID:5311	hsa-mir-98	0.473295
CID:5757	hsa-mir-139	0.473055
CID:3385	hsa-mir-346	0.472942
CID:451668	hsa-mir-196b	0.472381
CID:5311	hsa-mir-365a	0.472356
CID:451668	hsa-mir-302b	0.472019
CID:451668	hsa-mir-10a	0.472002
CID:60750	hsa-mir-30b	0.471823
CID:448537	hsa-mir-494	0.471818
CID:60750	hsa-mir-26b	0.471793
CID:60750	hsa-mir-140	0.471556
CID:5757	hsa-mir-30e	0.47152
CID:5757	hsa-mir-30d	0.471306
CID:5757	hsa-mir-206	0.471239
CID:60750	hsa-mir-302a	0.471228
CID:5757	hsa-mir-181d	0.47117
CID:3385	hsa-mir-33a	0.471123
CID:3385	hsa-mir-422a	0.471012
CID:451668	hsa-mir-497	0.47054
CID:448537	hsa-mir-181c	0.47038
CID:451668	hsa-mir-30e	0.470361
CID:5311	hsa-mir-367	0.470287
CID:3229	hsa-mir-191	0.470139
CID:60750	hsa-mir-10a	0.47005
CID:3229	hsa-mir-149	0.469971
CID:60750	hsa-mir-296	0.469734
CID:5757	hsa-mir-129-2	0.46955
CID:60750	hsa-mir-137	0.469495
CID:3229	hsa-mir-194-1	0.469456
CID:3385	hsa-mir-487b	0.469317
CID:5311	hsa-mir-211	0.469316
CID:451668	hsa-mir-197	0.469182
CID:3385	hsa-mir-217	0.468971
CID:451668	hsa-mir-373	0.468889
CID:5311	hsa-mir-219-1	0.468643
CID:3229	hsa-mir-151a	0.468506
CID:3229	hsa-mir-137	0.468414
CID:60750	hsa-mir-429	0.467909
CID:3385	hsa-mir-502	0.467612
CID:451668	hsa-mir-204	0.467412
CID:5757	hsa-mir-130b	0.467247
CID:3385	hsa-mir-498	0.467229
CID:451668	hsa-mir-99b	0.467139
CID:3385	hsa-mir-516a-1	0.466302
CID:5757	hsa-mir-574	0.46623
CID:448537	hsa-mir-301a	0.466014
CID:451668	hsa-mir-140	0.465932
CID:3385	hsa-mir-526a-1	0.465899
CID:3229	hsa-mir-302b	0.46577
CID:3385	hsa-mir-642a	0.465664
CID:60750	hsa-mir-194-2	0.465533
CID:448537	hsa-mir-449b	0.465356
CID:448537	hsa-mir-153-2	0.46531
CID:5311	hsa-mir-423	0.465007
CID:3229	hsa-mir-196b	0.464932
CID:3229	hsa-mir-10a	0.464926
CID:5311	hsa-mir-339	0.464703
CID:5757	hsa-mir-328	0.464662
CID:448537	hsa-mir-330	0.464468
CID:3385	hsa-mir-516a-2	0.46442
CID:5757	hsa-mir-629	0.464397
CID:5757	hsa-mir-212	0.464298
CID:60750	hsa-mir-192	0.46406
CID:5311	hsa-mir-663a	0.463951
CID:3229	hsa-mir-497	0.463874
CID:5757	hsa-mir-708	0.463791
CID:448537	hsa-mir-520d	0.463765
CID:60750	hsa-mir-206	0.4635
CID:448537	hsa-mir-32	0.463337
CID:5311	hsa-mir-215	0.463116
CID:5757	hsa-mir-499a	0.462992
CID:60750	hsa-mir-30e	0.462503
CID:5311	hsa-mir-449a	0.462453
CID:60750	hsa-mir-30d	0.462401
CID:451668	hsa-mir-499a	0.462217
CID:3385	hsa-mir-532	0.462175
CID:3229	hsa-mir-197	0.462041
CID:60750	hsa-mir-196b	0.461403
CID:448537	hsa-mir-483	0.461342
CID:60750	hsa-mir-130b	0.461297
CID:60750	hsa-mir-181d	0.461146
CID:3229	hsa-mir-204	0.460762
CID:5311	hsa-mir-144	0.460497
CID:60750	hsa-mir-499a	0.460451
CID:448537	hsa-mir-381	0.460447
CID:3229	hsa-mir-373	0.460169
CID:451668	hsa-mir-302a	0.459941
CID:3229	hsa-mir-99b	0.459926
CID:3385	hsa-mir-550a-2	0.459152
CID:3385	hsa-mir-550a-1	0.459138
CID:60750	hsa-mir-574	0.459059
CID:5757	hsa-mir-92b	0.458794
CID:3229	hsa-mir-320a	0.458759
CID:5757	hsa-mir-338	0.458631
CID:451668	hsa-mir-128-1	0.458106
CID:5288826	hsa-mir-17	0.458085
CID:60750	hsa-mir-629	0.457995
CID:60750	hsa-mir-98	0.457815
CID:5311	hsa-mir-28	0.457785
CID:448537	hsa-mir-134	0.457554
CID:448537	hsa-mir-376a-2	0.457521
CID:5757	hsa-mir-625	0.457375
CID:5311	hsa-mir-424	0.457221
CID:3229	hsa-mir-140	0.457219
CID:448537	hsa-mir-376a-1	0.456821
CID:5311	hsa-mir-324	0.456257
CID:451668	hsa-mir-212	0.456182
CID:3385	hsa-mir-518c	0.455867
CID:3385	hsa-mir-485	0.455726
CID:3385	hsa-mir-1290	0.455653
CID:451668	hsa-mir-135a-1	0.455621
CID:3385	hsa-mir-331	0.455391
CID:5311	hsa-mir-372	0.45516
CID:60750	hsa-mir-542	0.454634
CID:451668	hsa-mir-98	0.454616
CID:3385	hsa-mir-382	0.454386
CID:3385	hsa-mir-374a	0.454302
CID:5311	hsa-mir-370	0.454187
CID:60750	hsa-mir-92b	0.454017
CID:451668	hsa-mir-30d	0.453551
CID:5311	hsa-mir-494	0.453449
CID:3385	hsa-mir-379	0.453352
CID:3385	hsa-mir-584	0.453208
CID:448537	hsa-mir-95	0.45301
CID:60750	hsa-mir-338	0.452424
CID:3385	hsa-mir-744	0.452304
CID:448537	hsa-mir-425	0.452237
CID:3229	hsa-mir-98	0.452107
CID:60750	hsa-mir-708	0.451806
CID:3229	hsa-mir-302a	0.451565
CID:451668	hsa-mir-194-2	0.451519
CID:3385	hsa-mir-874	0.451489
CID:3229	hsa-mir-302c	0.451355
CID:5757	hsa-mir-28	0.451332
CID:5311	hsa-mir-181c	0.451251
CID:448537	hsa-mir-326	0.45124
CID:60750	hsa-mir-625	0.450907
CID:451668	hsa-mir-296	0.45069
CID:5288826	hsa-mir-126	0.450612
CID:3229	hsa-mir-135a-1	0.450465
CID:3229	hsa-mir-499a	0.450267
CID:5311	hsa-mir-330	0.450265
CID:3385	hsa-mir-500a	0.449905
CID:5311	hsa-mir-153-2	0.449866
CID:3385	hsa-mir-517a	0.449839
CID:3229	hsa-mir-181d	0.449749
CID:451668	hsa-mir-328	0.449615
CID:5311	hsa-mir-301a	0.449515
CID:3385	hsa-mir-323a	0.449327
CID:5311	hsa-mir-449b	0.449205
CID:3385	hsa-mir-421	0.449131
CID:448537	hsa-mir-491	0.448881
CID:448537	hsa-mir-383	0.448802
CID:5757	hsa-mir-302d	0.448589
CID:5757	hsa-mir-186	0.448578
CID:451668	hsa-mir-129-2	0.447765
CID:451668	hsa-mir-708	0.447677
CID:3385	hsa-mir-520e	0.44725
CID:5311	hsa-mir-520d	0.446926
CID:5311	hsa-mir-32	0.44641
CID:3229	hsa-mir-30d	0.445922
CID:3385	hsa-mir-508	0.445849
CID:5757	hsa-mir-144	0.445821
CID:3229	hsa-mir-194-2	0.445757
CID:448537	hsa-mir-520h	0.44528
CID:3385	hsa-mir-506	0.443791
CID:5757	hsa-mir-365a	0.44375
CID:3229	hsa-mir-296	0.443629
CID:5311	hsa-mir-483	0.443527
CID:451668	hsa-mir-139	0.443499
CID:448537	hsa-mir-148b	0.443481
CID:5757	hsa-mir-449a	0.443389
CID:3385	hsa-mir-515-1	0.443388
CID:5757	hsa-mir-185	0.443233
CID:448537	hsa-mir-299	0.443078
CID:451668	hsa-mir-92b	0.443036
CID:451668	hsa-mir-338	0.442928
CID:3385	hsa-mir-202	0.442734
CID:60750	hsa-mir-302d	0.442729
CID:5288826	hsa-mir-34a	0.442683
CID:3385	hsa-mir-433	0.442129
CID:3229	hsa-mir-708	0.441796
CID:451668	hsa-mir-181c	0.441728
CID:5757	hsa-mir-452	0.441486
CID:3385	hsa-mir-455	0.441252
CID:3385	hsa-mir-515-2	0.44109
CID:3385	hsa-mir-1224	0.441064
CID:60750	hsa-mir-28	0.440948
CID:5288826	hsa-mir-20a	0.440764
CID:448537	hsa-mir-129-1	0.440665
CID:5757	hsa-mir-181c	0.440639
CID:60750	hsa-mir-452	0.440584
CID:60750	hsa-mir-424	0.440104
CID:5757	hsa-mir-367	0.439957
CID:3229	hsa-mir-328	0.439817
CID:3229	hsa-mir-129-2	0.439586
CID:3385	hsa-mir-526a-2	0.438928
CID:60750	hsa-mir-144	0.438619
CID:5311	hsa-mir-95	0.43854
CID:448537	hsa-mir-216a	0.438252
CID:3385	hsa-mir-503	0.438077
CID:451668	hsa-mir-542	0.438076
CID:5757	hsa-mir-339	0.437987
CID:5757	hsa-mir-372	0.437838
CID:448537	hsa-mir-184	0.437496
CID:448537	hsa-mir-376c	0.437354
CID:451668	hsa-mir-130b	0.437303
CID:60750	hsa-mir-185	0.437197
CID:3229	hsa-mir-338	0.437193
CID:3385	hsa-mir-216b	0.437121
CID:5757	hsa-mir-215	0.437041
CID:5757	hsa-mir-219-1	0.436775
CID:448537	hsa-mir-187	0.436471
CID:60750	hsa-mir-365a	0.43632
CID:5288826	hsa-mir-145	0.43625
CID:5288826	hsa-let-7a-1	0.436193
CID:448537	hsa-mir-650	0.436115
CID:5311	hsa-mir-326	0.436074
CID:451668	hsa-mir-574	0.436
CID:5288826	hsa-mir-92a-1	0.435932
CID:60750	hsa-mir-367	0.435632
CID:5288826	hsa-mir-181a-1	0.435382
CID:451668	hsa-mir-144	0.435353
CID:3385	hsa-mir-519d	0.435109
CID:448537	hsa-mir-519c	0.434949
CID:5757	hsa-mir-370	0.434654
CID:3229	hsa-mir-28	0.434349
CID:448537	hsa-mir-208a	0.434349
CID:3229	hsa-mir-92b	0.434291
CID:5757	hsa-mir-494	0.434211
CID:60750	hsa-mir-219-1	0.434172
CID:60750	hsa-mir-663a	0.433498
CID:5757	hsa-mir-423	0.433265
CID:60750	hsa-mir-449a	0.43315
CID:3385	hsa-mir-492	0.433122
CID:3229	hsa-mir-181c	0.432901
CID:3385	hsa-mir-512-2	0.432752
CID:60750	hsa-mir-215	0.431503
CID:3229	hsa-mir-542	0.431093
CID:5311	hsa-mir-491	0.431016
CID:5311	hsa-mir-520h	0.430452
CID:3229	hsa-mir-130b	0.430437
CID:3229	hsa-mir-638	0.430316
CID:5757	hsa-mir-345	0.430302
CID:3385	hsa-mir-301b	0.430207
CID:60750	hsa-mir-423	0.430176
CID:448537	hsa-mir-520a	0.430176
CID:451668	hsa-mir-372	0.430074
CID:60750	hsa-mir-181c	0.429897
CID:5288826	hsa-mir-29a	0.429792
CID:3229	hsa-mir-574	0.429638
CID:3385	hsa-mir-520f	0.42885
CID:5311	hsa-mir-371a	0.428514
CID:5288826	hsa-let-7b	0.428242
CID:5288826	hsa-mir-143	0.428058
CID:5757	hsa-mir-301a	0.427426
CID:3229	hsa-mir-144	0.427402
CID:5288826	hsa-let-7a-2	0.427112
CID:3385	hsa-mir-504	0.427075
CID:5288826	hsa-let-7a-3	0.42698
CID:3385	hsa-mir-320b-1	0.426762
CID:3385	hsa-mir-320b-2	0.426757
CID:5311	hsa-mir-129-1	0.42636
CID:448537	hsa-mir-513a-1	0.426251
CID:5288826	hsa-mir-18a	0.426193
CID:448537	hsa-mir-513a-2	0.426012
CID:5757	hsa-mir-449b	0.425976
CID:60750	hsa-mir-370	0.425899
CID:60750	hsa-mir-494	0.425789
CID:5311	hsa-mir-148b	0.425731
CID:3385	hsa-mir-519e	0.425317
CID:451668	hsa-mir-629	0.424919
CID:5311	hsa-mir-216a	0.424913
CID:448537	hsa-mir-520b	0.424824
CID:448537	hsa-mir-363	0.424818
CID:451668	hsa-mir-625	0.42408
CID:5288826	hsa-mir-15a	0.423884
CID:5311	hsa-mir-376c	0.423746
CID:3229	hsa-mir-424	0.423699
CID:5288826	hsa-mir-181a-2	0.423284
CID:5288826	hsa-mir-210	0.423063
CID:60750	hsa-mir-301a	0.422396
CID:3385	hsa-mir-484	0.422308
CID:451668	hsa-mir-663a	0.422151
CID:5757	hsa-mir-32	0.422062
CID:5311	hsa-mir-187	0.422046
CID:451668	hsa-mir-302d	0.421919
CID:451668	hsa-mir-370	0.421826
CID:3229	hsa-mir-372	0.421534
CID:5311	hsa-mir-519c	0.421453
CID:5757	hsa-mir-483	0.421029
CID:3385	hsa-mir-489	0.420962
CID:448537	hsa-mir-432	0.420862
CID:5311	hsa-mir-650	0.420801
CID:5311	hsa-mir-184	0.420694
CID:5757	hsa-mir-153-2	0.420528
CID:5288826	hsa-mir-222	0.420406
CID:3229	hsa-mir-629	0.42008
CID:451668	hsa-mir-219-1	0.419953
CID:3229	hsa-mir-625	0.419629
CID:3385	hsa-mir-208b	0.419568
CID:60750	hsa-mir-520d	0.41946
CID:3385	hsa-mir-516b-1	0.419357
CID:60750	hsa-mir-449b	0.419123
CID:448537	hsa-mir-154	0.418706
CID:5311	hsa-mir-361	0.418665
CID:5288826	hsa-mir-29b-1	0.418547
CID:448537	hsa-mir-340	0.41851
CID:5311	hsa-mir-208a	0.418359
CID:448537	hsa-mir-520c	0.418281
CID:5288826	hsa-mir-19a	0.417999
CID:451668	hsa-mir-339	0.417923
CID:5288826	hsa-mir-223	0.417814
CID:3385	hsa-mir-885	0.417685
CID:3385	hsa-mir-516b-2	0.41761
CID:5288826	hsa-mir-200b	0.41757
CID:3229	hsa-mir-663a	0.417064
CID:5311	hsa-mir-454	0.41651
CID:5311	hsa-mir-520a	0.416416
CID:60750	hsa-mir-483	0.416351
CID:3229	hsa-mir-302d	0.416188
CID:448537	hsa-mir-495	0.416139
CID:60750	hsa-mir-32	0.415895
CID:5288826	hsa-mir-31	0.415892
CID:5757	hsa-mir-208a	0.415719
CID:3229	hsa-mir-370	0.415258
CID:448537	hsa-mir-302f	0.41525
CID:451668	hsa-mir-186	0.415215
CID:5288826	hsa-mir-199a-2	0.414976
CID:5757	hsa-mir-381	0.414924
CID:5288826	hsa-let-7e	0.414715
CID:5757	hsa-mir-376a-1	0.414591
CID:60750	hsa-mir-381	0.414409
CID:3385	hsa-mir-622	0.414277
CID:448537	hsa-mir-153-1	0.414277
CID:60750	hsa-mir-153-2	0.41427
CID:3385	hsa-mir-590	0.414099
CID:5757	hsa-mir-376a-2	0.414093
CID:3385	hsa-mir-513b	0.414017
CID:451668	hsa-mir-449a	0.414002
CID:448537	hsa-mir-190a	0.413714
CID:5757	hsa-mir-330	0.413396
CID:3385	hsa-mir-302e	0.413346
CID:451668	hsa-mir-483	0.413339
CID:5288826	hsa-mir-19b-1	0.413315
CID:448537	hsa-mir-1915	0.413253
CID:5288826	hsa-mir-200c	0.413121
CID:5311	hsa-mir-513a-1	0.413058
CID:3229	hsa-mir-219-1	0.412794
CID:3385	hsa-mir-513c	0.412757
CID:5288826	hsa-mir-199a-1	0.412695
CID:5311	hsa-mir-513a-2	0.412692
CID:5288826	hsa-mir-92a-2	0.412598
CID:5288826	hsa-mir-29c	0.412349
CID:5757	hsa-mir-491	0.412165
CID:3229	hsa-mir-494	0.412021
CID:5757	hsa-mir-134	0.411872
CID:5288826	hsa-mir-1-1	0.411754
CID:5288826	hsa-mir-30a	0.41162
CID:451668	hsa-mir-208a	0.411561
CID:451668	hsa-mir-215	0.411535
CID:451668	hsa-mir-211	0.411476
CID:451668	hsa-mir-367	0.411258
CID:3385	hsa-mir-760	0.41119
CID:5311	hsa-mir-493	0.410914
CID:5311	hsa-mir-520b	0.41086
CID:5288826	hsa-let-7c	0.410851
CID:5757	hsa-mir-95	0.410689
CID:5288826	hsa-mir-146b	0.410581
CID:5757	hsa-mir-324	0.410445
CID:3229	hsa-mir-339	0.410282
CID:3229	hsa-mir-449a	0.410107
CID:3229	hsa-mir-186	0.41009
CID:5311	hsa-mir-363	0.409748
CID:5288826	hsa-mir-106b	0.409591
CID:3385	hsa-mir-519a-1	0.40956
CID:5288826	hsa-mir-9-1	0.409478
CID:451668	hsa-mir-452	0.408655
CID:60750	hsa-mir-376a-1	0.40858
CID:60750	hsa-mir-376a-2	0.408538
CID:3385	hsa-mir-539	0.40806
CID:3385	hsa-mir-661	0.407676
CID:60750	hsa-mir-134	0.407593
CID:3385	hsa-mir-136	0.40724
CID:3385	hsa-mir-526b	0.407095
CID:5288826	hsa-mir-1-2	0.406675
CID:3385	hsa-mir-593	0.406571
CID:60750	hsa-mir-95	0.406532
CID:3229	hsa-mir-211	0.406489
CID:448537	hsa-mir-362	0.406269
CID:448537	hsa-mir-219-2	0.406261
CID:60750	hsa-mir-208a	0.40622
CID:448537	hsa-mir-198	0.406057
CID:3385	hsa-mir-450a-1	0.406038
CID:3385	hsa-mir-300	0.405638
CID:448537	hsa-mir-516a-1	0.405486
CID:5311	hsa-mir-340	0.405373
CID:5288826	hsa-mir-29b-2	0.405325
CID:5311	hsa-mir-154	0.405312
CID:5288826	hsa-mir-124-1	0.405228
CID:60750	hsa-mir-491	0.405225
CID:3229	hsa-mir-367	0.405213
CID:3229	hsa-mir-215	0.405095
CID:5288826	hsa-mir-182	0.405087
CID:5311	hsa-mir-488	0.405069
CID:3385	hsa-mir-595	0.404921
CID:5288826	hsa-mir-9-2	0.40478
CID:448537	hsa-mir-487b	0.40468
CID:5311	hsa-mir-520c	0.404426
CID:5288826	hsa-let-7d	0.404395
CID:448537	hsa-mir-502	0.40433
CID:3385	hsa-mir-450a-2	0.404183
CID:5311	hsa-mir-495	0.40415
CID:448537	hsa-mir-516a-2	0.404019
CID:3385	hsa-mir-323b	0.403987
CID:3229	hsa-mir-452	0.403662
CID:5288826	hsa-mir-27a	0.40358
CID:3385	hsa-mir-548d-1	0.403554
CID:448537	hsa-mir-501	0.403554
CID:5757	hsa-mir-371a	0.403549
CID:3385	hsa-mir-548d-2	0.403535
CID:5288826	hsa-mir-9-3	0.40335
CID:5757	hsa-mir-326	0.403342
CID:5288826	hsa-mir-142	0.403241
CID:3229	hsa-mir-483	0.403055
CID:3385	hsa-mir-512-1	0.402769
CID:5757	hsa-mir-520h	0.402602
CID:451668	hsa-mir-185	0.402589
CID:3229	hsa-mir-208a	0.402276
CID:451668	hsa-mir-491	0.402132
CID:5288826	hsa-let-7g	0.402038
CID:5311	hsa-mir-1915	0.401851
CID:448537	hsa-mir-217	0.401731
CID:5757	hsa-mir-148b	0.401349
CID:3385	hsa-mir-33b	0.401304
CID:5288826	hsa-mir-124-2	0.401139
CID:451668	hsa-mir-365a	0.401059
CID:5288826	hsa-let-7i	0.401043
CID:451668	hsa-mir-301a	0.400864
CID:5311	hsa-mir-153-1	0.400458
CID:5311	hsa-mir-190a	0.400222
CID:5757	hsa-mir-425	0.400217
CID:3385	hsa-mir-630	0.400131
CID:60750	hsa-mir-425	0.400095
CID:5311	hsa-mir-302f	0.399975
CID:3385	hsa-mir-615	0.399827
CID:60750	hsa-mir-520h	0.399735
CID:448537	hsa-mir-320c-2	0.399698
CID:60750	hsa-mir-148b	0.399377
CID:451668	hsa-mir-423	0.399161
CID:3229	hsa-mir-185	0.398767
CID:451668	hsa-mir-32	0.398595
CID:5311	hsa-mir-608	0.39829
CID:5757	hsa-mir-184	0.398099
CID:60750	hsa-mir-371a	0.397969
CID:5757	hsa-mir-299	0.39775
CID:5288826	hsa-mir-34c	0.397436
CID:3229	hsa-mir-365a	0.397037
CID:5288826	hsa-let-7f-1	0.396848
CID:5757	hsa-mir-383	0.396844
CID:3385	hsa-mir-514a-1	0.396539
CID:3385	hsa-mir-514a-2	0.396523
CID:448537	hsa-mir-147a	0.396378
CID:448537	hsa-mir-532	0.396216
CID:5288826	hsa-mir-125a	0.396079
CID:3385	hsa-mir-519a-2	0.395886
CID:5288826	hsa-mir-195	0.395863
CID:60750	hsa-mir-383	0.395761
CID:3229	hsa-mir-491	0.395624
CID:448537	hsa-mir-498	0.395512
CID:448537	hsa-mir-1290	0.39543
CID:5311	hsa-mir-526a-1	0.39531
CID:60750	hsa-mir-129-1	0.395117
CID:5288826	hsa-mir-200a	0.395076
CID:5288826	hsa-mir-34b	0.395017
CID:3229	hsa-mir-301a	0.394849
CID:5757	hsa-mir-376c	0.394701
CID:5288826	hsa-mir-133a-1	0.394499
CID:5757	hsa-mir-129-1	0.393911
CID:451668	hsa-mir-153-2	0.393887
CID:5311	hsa-mir-198	0.393856
CID:5311	hsa-mir-346	0.393617
CID:448537	hsa-mir-550a-2	0.393174
CID:5288826	hsa-mir-27b	0.393156
CID:448537	hsa-mir-550a-1	0.393154
CID:5311	hsa-mir-219-2	0.392911
CID:3229	hsa-mir-32	0.392489
CID:60750	hsa-mir-376c	0.392291
CID:451668	hsa-mir-345	0.392133
CID:3229	hsa-mir-423	0.392024
CID:448537	hsa-mir-379	0.391854
CID:5288826	hsa-mir-7-1	0.391798
CID:5288826	hsa-mir-19b-2	0.391769
CID:5288826	hsa-mir-124-3	0.391532
CID:448537	hsa-mir-320c-1	0.391501
CID:5288826	hsa-mir-205	0.391489
CID:448537	hsa-mir-518c	0.391473
CID:5311	hsa-mir-501	0.391357
CID:60750	hsa-mir-184	0.391338
CID:448537	hsa-mir-584	0.391174
CID:5288826	hsa-mir-133b	0.391164
CID:448537	hsa-mir-500a	0.391094
CID:5311	hsa-mir-362	0.390751
CID:448537	hsa-mir-874	0.390537
CID:3385	hsa-mir-652	0.389912
CID:448537	hsa-mir-517a	0.389885
CID:60750	hsa-mir-216a	0.389747
CID:3385	hsa-mir-509-1	0.389692
CID:5288826	hsa-mir-133a-2	0.389621
CID:448537	hsa-mir-331	0.389609
CID:3385	hsa-mir-329-1	0.389366
CID:5288826	hsa-mir-486	0.389342
CID:5288826	hsa-mir-375	0.389327
CID:5288826	hsa-mir-148a	0.389298
CID:5288826	hsa-mir-106a	0.389273
CID:5288826	hsa-mir-7-2	0.389021
CID:5311	hsa-mir-217	0.389017
CID:3229	hsa-mir-153-2	0.388883
CID:448537	hsa-mir-744	0.38878
CID:5311	hsa-mir-642a	0.388586
CID:5288826	hsa-mir-214	0.38817
CID:448537	hsa-mir-374a	0.388035
CID:448537	hsa-mir-508	0.38788
CID:448537	hsa-mir-382	0.387808
CID:451668	hsa-mir-381	0.387546
CID:5288826	hsa-mir-22	0.387371
CID:3229	hsa-mir-345	0.387096
CID:5757	hsa-mir-187	0.387016
CID:5311	hsa-mir-422a	0.386709
CID:451668	hsa-mir-371a	0.386349
CID:5311	hsa-mir-320c-2	0.386176
CID:448537	hsa-mir-515-1	0.385999
CID:5288826	hsa-mir-7-3	0.385664
CID:3385	hsa-mir-410	0.385453
CID:5288826	hsa-mir-10b	0.385282
CID:451668	hsa-mir-95	0.385281
CID:5288826	hsa-mir-100	0.385046
CID:3385	hsa-mir-329-2	0.384795
CID:448537	hsa-mir-520e	0.384617
CID:5311	hsa-mir-1290	0.384617
CID:5311	hsa-mir-147a	0.384588
CID:448537	hsa-mir-515-2	0.384429
CID:448537	hsa-mir-506	0.384156
CID:60750	hsa-mir-520a	0.384055
CID:448537	hsa-mir-323a	0.383969
CID:5288826	hsa-mir-196a-2	0.383932
CID:5757	hsa-mir-154	0.383913
CID:5757	hsa-mir-363	0.383619
CID:451668	hsa-mir-449b	0.383481
CID:60750	hsa-mir-519c	0.383273
CID:448537	hsa-mir-526a-2	0.383192
CID:5311	hsa-mir-550a-2	0.383183
CID:5311	hsa-mir-550a-1	0.383157
CID:5311	hsa-mir-532	0.383072
CID:451668	hsa-mir-148b	0.382957
CID:451668	hsa-mir-409	0.382943
CID:60750	hsa-mir-650	0.382886
CID:5288826	hsa-mir-141	0.382596
CID:5288826	hsa-mir-93	0.382562
CID:448537	hsa-mir-320d-1	0.382305
CID:448537	hsa-mir-421	0.382269
CID:451668	hsa-mir-337	0.382155
CID:5757	hsa-mir-520a	0.381982
CID:60750	hsa-mir-361	0.381955
CID:5288826	hsa-mir-183	0.381864
CID:5288826	hsa-mir-101-1	0.381713
CID:5757	hsa-mir-361	0.381602
CID:448537	hsa-mir-485	0.381527
CID:60750	hsa-mir-363	0.381512
CID:3229	hsa-mir-95	0.381435
CID:448537	hsa-mir-202	0.381351
CID:451668	hsa-mir-326	0.381205
CID:5311	hsa-mir-33a	0.381169
CID:5311	hsa-mir-498	0.381079
CID:5311	hsa-mir-320c-1	0.380804
CID:3229	hsa-mir-381	0.380797
CID:451668	hsa-mir-184	0.380671
CID:3229	hsa-mir-449b	0.380493
CID:5311	hsa-mir-500a	0.380268
CID:3229	hsa-mir-371a	0.380251
CID:60750	hsa-mir-454	0.380137
CID:5757	hsa-mir-520b	0.380041
CID:60750	hsa-mir-520b	0.380021
CID:5757	hsa-mir-519c	0.379771
CID:5311	hsa-mir-518c	0.379682
CID:5311	hsa-mir-874	0.37964
CID:5288826	hsa-mir-122	0.379569
CID:3385	hsa-mir-510	0.379426
CID:5311	hsa-mir-584	0.379405
CID:3385	hsa-mir-657	0.379283
CID:448537	hsa-mir-519d	0.379031
CID:451668	hsa-mir-376a-1	0.37895
CID:5311	hsa-mir-517a	0.378767
CID:448537	hsa-mir-1224	0.378618
CID:60750	hsa-mir-432	0.378605
CID:60750	hsa-mir-513a-1	0.378523
CID:5288826	hsa-mir-25	0.378478
CID:60750	hsa-mir-513a-2	0.378453
CID:3229	hsa-mir-409	0.378295
CID:3229	hsa-mir-337	0.378124
CID:5288826	hsa-mir-101-2	0.378026
CID:3385	hsa-mir-325	0.377761
CID:3229	hsa-mir-148b	0.377517
CID:448537	hsa-mir-455	0.377407
CID:451668	hsa-mir-134	0.377322
CID:3385	hsa-mir-646	0.377102
CID:5311	hsa-mir-508	0.376777
CID:5757	hsa-mir-454	0.376749
CID:5311	hsa-mir-331	0.37653
CID:448537	hsa-mir-512-2	0.376528
CID:3385	hsa-mir-1303	0.376261
CID:5757	hsa-mir-513a-2	0.376257
CID:451668	hsa-mir-129-1	0.376243
CID:5311	hsa-mir-374a	0.376019
CID:451668	hsa-mir-520d	0.375967
CID:5757	hsa-mir-513a-1	0.375938
CID:3229	hsa-mir-376a-1	0.375747
CID:451668	hsa-mir-376a-2	0.375705
CID:3385	hsa-mir-411	0.375589
CID:3385	hsa-mir-450b	0.375586
CID:5757	hsa-mir-153-1	0.375567
CID:5288826	hsa-mir-193b	0.375473
CID:3385	hsa-mir-2110	0.375399
CID:5757	hsa-mir-520c	0.37537
CID:3385	hsa-mir-524	0.375365
CID:5757	hsa-mir-219-2	0.375338
CID:5311	hsa-mir-515-1	0.3752
CID:3229	hsa-mir-184	0.375034
CID:5757	hsa-mir-432	0.37495
CID:451668	hsa-mir-363	0.374835
CID:5757	hsa-mir-650	0.374615
CID:60750	hsa-mir-520c	0.374274
CID:3385	hsa-mir-520g	0.374229
CID:3229	hsa-mir-326	0.37405
CID:5311	hsa-mir-515-2	0.373739
CID:5311	hsa-mir-506	0.373455
CID:5288826	hsa-mir-342	0.373183
CID:3385	hsa-mir-297	0.373069
CID:3229	hsa-mir-376a-2	0.372848
CID:60750	hsa-mir-493	0.372822
CID:3229	hsa-mir-134	0.372738
CID:448537	hsa-mir-433	0.372736
CID:448537	hsa-mir-320b-1	0.372725
CID:448537	hsa-mir-320b-2	0.372703
CID:5311	hsa-mir-526a-2	0.372624
CID:3385	hsa-mir-1249	0.372574
CID:3385	hsa-mir-320e	0.372548
CID:5311	hsa-mir-520e	0.372459
CID:5288826	hsa-mir-193a	0.37232
CID:5288826	hsa-mir-218-2	0.372072
CID:5311	hsa-mir-323a	0.371828
CID:5288826	hsa-mir-196a-1	0.371715
CID:5311	hsa-mir-320d-1	0.371661
CID:448537	hsa-mir-519e	0.371559
CID:5757	hsa-mir-302f	0.371413
CID:5757	hsa-mir-493	0.371386
CID:5288826	hsa-mir-99a	0.371288
CID:60750	hsa-mir-340	0.371197
CID:3385	hsa-mir-519b	0.371084
CID:448537	hsa-mir-216b	0.370823
CID:60750	hsa-mir-495	0.370181
CID:5311	hsa-mir-202	0.369991
CID:5757	hsa-mir-495	0.369991
CID:3229	hsa-mir-520d	0.369928
CID:3385	hsa-mir-507	0.369893
CID:451668	hsa-mir-330	0.369859
CID:448537	hsa-mir-301b	0.369715
CID:5757	hsa-mir-190a	0.369634
CID:60750	hsa-mir-302f	0.369572
CID:5288826	hsa-mir-199b	0.369524
CID:60750	hsa-mir-153-1	0.369291
CID:5757	hsa-mir-340	0.369182
CID:3229	hsa-mir-129-1	0.368969
CID:5311	hsa-mir-421	0.368552
CID:5288826	hsa-mir-20b	0.36849
CID:5311	hsa-mir-519d	0.368476
CID:60750	hsa-mir-219-2	0.368332
CID:3229	hsa-mir-363	0.368172
CID:448537	hsa-mir-503	0.368166
CID:3385	hsa-mir-640	0.367982
CID:448537	hsa-mir-504	0.367409
CID:5311	hsa-mir-203a	0.367291
CID:60750	hsa-mir-190a	0.367097
CID:5288826	hsa-mir-127	0.367006
CID:5288826	hsa-mir-378a	0.366766
CID:60750	hsa-mir-488	0.366712
CID:3385	hsa-mir-1258	0.366658
CID:5311	hsa-mir-485	0.36662
CID:3385	hsa-mir-1271	0.366458
CID:451668	hsa-mir-383	0.366291
CID:451668	hsa-mir-376c	0.366245
CID:5288826	hsa-mir-218-1	0.366189
CID:3385	hsa-mir-551a	0.365806
CID:451668	hsa-mir-324	0.365763
CID:5311	hsa-mir-1224	0.365743
CID:3385	hsa-mir-188	0.365602
CID:5288826	hsa-mir-30b	0.365597
CID:5311	hsa-mir-512-2	0.365427
CID:5311	hsa-mir-455	0.365236
CID:3229	hsa-mir-330	0.365057
CID:5757	hsa-mir-488	0.364748
CID:5288826	hsa-mir-130a	0.364723
CID:448537	hsa-mir-516b-1	0.364366
CID:5757	hsa-mir-198	0.364303
CID:3385	hsa-mir-518e	0.364175
CID:60750	hsa-mir-362	0.3641
CID:5311	hsa-mir-492	0.363655
CID:448537	hsa-mir-489	0.363443
CID:5288826	hsa-mir-335	0.363315
CID:448537	hsa-mir-516b-2	0.363069
CID:5311	hsa-mir-320b-1	0.363003
CID:5311	hsa-mir-320b-2	0.362973
CID:5288826	hsa-mir-224	0.362909
CID:451668	hsa-mir-520h	0.362525
CID:5288826	hsa-mir-96	0.362492
CID:3385	hsa-mir-544b	0.362241
CID:3385	hsa-mir-637	0.362102
CID:5288826	hsa-mir-128-2	0.362052
CID:60750	hsa-mir-1915	0.361993
CID:5757	hsa-mir-362	0.361694
CID:5311	hsa-mir-519e	0.361664
CID:5311	hsa-mir-671	0.361208
CID:3229	hsa-mir-383	0.361169
CID:3229	hsa-mir-324	0.36081
CID:5288826	hsa-mir-103a-2	0.36081
CID:5288826	hsa-mir-451a	0.360721
CID:3385	hsa-mir-377	0.360657
CID:5288826	hsa-mir-206	0.360504
CID:3229	hsa-mir-376c	0.360383
CID:60750	hsa-mir-198	0.360323
CID:451668	hsa-mir-219-2	0.359974
CID:5288826	hsa-mir-138-1	0.359951
CID:448537	hsa-mir-885	0.359932
CID:3385	hsa-mir-602	0.359795
CID:5757	hsa-mir-498	0.359732
CID:448537	hsa-mir-484	0.359563
CID:3385	hsa-mir-544a	0.359371
CID:448537	hsa-mir-760	0.358911
CID:3385	hsa-mir-636	0.358883
CID:5311	hsa-mir-301b	0.358862
CID:5311	hsa-mir-520f	0.358859
CID:3385	hsa-mir-518a-1	0.358589
CID:5311	hsa-mir-433	0.358486
CID:5757	hsa-mir-608	0.358363
CID:5311	hsa-mir-216b	0.358308
CID:60750	hsa-mir-422a	0.358259
CID:60750	hsa-mir-487b	0.358082
CID:448537	hsa-mir-622	0.35807
CID:60750	hsa-mir-608	0.357961
CID:60750	hsa-mir-501	0.357771
CID:3385	hsa-mir-621	0.357654
CID:3229	hsa-mir-520h	0.357624
CID:5757	hsa-mir-217	0.357569
CID:5757	hsa-mir-33a	0.357398
CID:5757	hsa-mir-422a	0.357366
CID:3385	hsa-mir-518d	0.357209
CID:5757	hsa-mir-487b	0.357101
CID:5757	hsa-mir-346	0.357069
CID:448537	hsa-mir-590	0.356902
CID:448537	hsa-mir-374b	0.356581
CID:451668	hsa-mir-299	0.356547
CID:5757	hsa-mir-501	0.356503
CID:5311	hsa-mir-504	0.356489
CID:5757	hsa-mir-485	0.35621
CID:60750	hsa-mir-526a-1	0.356124
CID:451668	hsa-mir-425	0.356006
CID:448537	hsa-mir-450a-1	0.355978
CID:5311	hsa-mir-503	0.355924
CID:448537	hsa-mir-1246	0.355831
CID:451668	hsa-mir-154	0.355742
CID:451668	hsa-mir-187	0.355489
CID:60750	hsa-mir-502	0.355449
CID:5288826	hsa-mir-135b	0.355365
CID:448537	hsa-mir-661	0.355257
CID:448537	hsa-mir-513b	0.355029
CID:60750	hsa-mir-33a	0.354929
CID:5311	hsa-mir-516b-1	0.354913
CID:448537	hsa-mir-526b	0.35491
CID:448537	hsa-mir-450a-2	0.354734
CID:5757	hsa-mir-502	0.354595
CID:5288826	hsa-mir-152	0.354459
CID:3385	hsa-mir-431	0.354456
CID:448537	hsa-mir-513c	0.354085
CID:60750	hsa-mir-147a	0.354046
CID:5311	hsa-mir-516b-2	0.353703
CID:60750	hsa-mir-550a-2	0.353664
CID:60750	hsa-mir-550a-1	0.353634
CID:451668	hsa-mir-153-1	0.353607
CID:448537	hsa-mir-320d-2	0.353574
CID:3229	hsa-mir-219-2	0.353523
CID:448537	hsa-mir-302e	0.353371
CID:5757	hsa-mir-642a	0.353344
CID:60750	hsa-mir-498	0.353143
CID:5311	hsa-mir-489	0.353098
CID:5288826	hsa-mir-138-2	0.35277
CID:3385	hsa-mir-765	0.35267
CID:5288826	hsa-mir-197	0.352533
CID:448537	hsa-mir-593	0.352463
CID:5757	hsa-mir-532	0.352397
CID:3229	hsa-mir-425	0.352372
CID:5288826	hsa-mir-192	0.352366
CID:5288826	hsa-mir-194-1	0.352207
CID:448537	hsa-mir-208b	0.351753
CID:3385	hsa-mir-147b	0.351602
CID:448537	hsa-mir-519a-1	0.351587
CID:3229	hsa-mir-154	0.351479
CID:448537	hsa-mir-539	0.351247
CID:3229	hsa-mir-299	0.351235
CID:448537	hsa-mir-136	0.350998
CID:60750	hsa-mir-516a-1	0.350956
CID:60750	hsa-mir-532	0.350801
CID:448537	hsa-mir-323b	0.350717
CID:5288826	hsa-mir-149	0.350328
CID:451668	hsa-mir-432	0.350156
CID:448537	hsa-mir-300	0.35013
CID:5311	hsa-mir-484	0.349998
CID:448537	hsa-mir-512-1	0.349979
CID:60750	hsa-mir-642a	0.349912
CID:60750	hsa-mir-516a-2	0.349491
CID:5311	hsa-mir-885	0.349355
CID:5288826	hsa-mir-18b	0.349307
CID:5288826	hsa-mir-151a	0.349272
CID:3229	hsa-mir-187	0.349024
CID:3229	hsa-mir-153-1	0.349018
CID:5288826	hsa-mir-302b	0.348939
CID:3385	hsa-mir-490	0.348881
CID:451668	hsa-mir-216a	0.348869
CID:5757	hsa-mir-526a-1	0.348763
CID:5311	hsa-mir-622	0.348191
CID:60750	hsa-mir-320c-2	0.347956
CID:5757	hsa-mir-516a-1	0.347643
CID:3385	hsa-mir-632	0.347178
CID:3385	hsa-mir-1469	0.347099
CID:5757	hsa-mir-147a	0.347092
CID:5757	hsa-mir-382	0.346842
CID:60750	hsa-mir-382	0.346762
CID:60750	hsa-mir-485	0.346691
CID:5757	hsa-mir-331	0.346591
CID:60750	hsa-mir-379	0.346502
CID:5288826	hsa-mir-137	0.346502
CID:5311	hsa-mir-590	0.346495
CID:60750	hsa-mir-1290	0.346441
CID:448537	hsa-mir-548d-1	0.346329
CID:448537	hsa-mir-548d-2	0.34626
CID:5288826	hsa-mir-429	0.346172
CID:5757	hsa-mir-516a-2	0.346037
CID:5311	hsa-mir-661	0.345957
CID:5288826	hsa-mir-140	0.345764
CID:448537	hsa-mir-514a-2	0.34558
CID:448537	hsa-mir-514a-1	0.345576
CID:3385	hsa-mir-522	0.345462
CID:5757	hsa-mir-323a	0.34546
CID:5288826	hsa-mir-497	0.345455
CID:3385	hsa-mir-1227	0.345449
CID:60750	hsa-mir-374a	0.345359
CID:448537	hsa-mir-615	0.345229
CID:60750	hsa-mir-331	0.345204
CID:5311	hsa-mir-526b	0.345128
CID:5311	hsa-mir-513b	0.344996
CID:3229	hsa-mir-216a	0.344631
CID:5288826	hsa-mir-373	0.344631
CID:5757	hsa-mir-379	0.344604
CID:60750	hsa-mir-584	0.344216
CID:5311	hsa-mir-513c	0.344194
CID:60750	hsa-mir-520e	0.343913
CID:5757	hsa-mir-374a	0.343875
CID:60750	hsa-mir-874	0.343703
CID:448537	hsa-mir-519a-2	0.343637
CID:3385	hsa-mir-628	0.343618
CID:5311	hsa-mir-320d-2	0.343572
CID:5311	hsa-mir-374b	0.343525
CID:451668	hsa-mir-361	0.343438
CID:5757	hsa-mir-1290	0.343435
CID:448537	hsa-mir-630	0.343371
CID:5288826	hsa-mir-204	0.343313
CID:5288826	hsa-mir-196b	0.342958
CID:5757	hsa-mir-550a-2	0.342837
CID:5757	hsa-mir-550a-1	0.342808
CID:5288826	hsa-mir-30e	0.342723
CID:5757	hsa-mir-520e	0.342647
CID:5288826	hsa-mir-10a	0.342566
CID:5311	hsa-mir-539	0.342515
CID:36462	hsa-mir-155	0.342373
CID:5288826	hsa-mir-499a	0.342365
CID:60750	hsa-mir-517a	0.342337
CID:5757	hsa-mir-584	0.342331
CID:60750	hsa-mir-323a	0.342279
CID:60750	hsa-mir-320c-1	0.342225
CID:5311	hsa-mir-1246	0.342117
CID:451668	hsa-mir-513a-2	0.342022
CID:60750	hsa-mir-518c	0.342006
CID:3229	hsa-mir-432	0.341948
CID:5311	hsa-mir-208b	0.341777
CID:5288826	hsa-mir-296	0.341656
CID:451668	hsa-mir-362	0.341466
CID:5311	hsa-mir-323b	0.341347
CID:60750	hsa-mir-508	0.341332
CID:451668	hsa-mir-513a-1	0.341215
CID:5311	hsa-mir-136	0.341181
CID:451668	hsa-mir-454	0.341104
CID:5288826	hsa-mir-302c	0.341091
CID:3385	hsa-mir-873	0.341082
CID:5311	hsa-mir-302e	0.340915
CID:5311	hsa-mir-758	0.340862
CID:60750	hsa-mir-500a	0.340251
CID:60750	hsa-mir-421	0.33991
CID:3385	hsa-mir-298	0.339831
CID:60750	hsa-mir-515-1	0.339471
CID:3229	hsa-mir-361	0.339361
CID:5288826	hsa-mir-328	0.339359
CID:5311	hsa-mir-519a-1	0.339331
CID:5311	hsa-mir-300	0.339324
CID:5311	hsa-mir-512-1	0.339315
CID:3385	hsa-mir-601	0.33923
CID:5288826	hsa-mir-135a-1	0.339188
CID:5288826	hsa-mir-128-1	0.339187
CID:5288826	hsa-mir-302a	0.339045
CID:3385	hsa-mir-505	0.339029
CID:60750	hsa-mir-744	0.339012
CID:5757	hsa-mir-216b	0.339012
CID:5288826	hsa-mir-30d	0.338978
CID:451668	hsa-mir-198	0.338884
CID:3385	hsa-mir-511-1	0.338877
CID:448537	hsa-mir-33b	0.338847
CID:5757	hsa-mir-874	0.338734
CID:5288826	hsa-mir-129-2	0.338547
CID:5757	hsa-mir-320c-2	0.338411
CID:5757	hsa-mir-517a	0.338373
CID:451668	hsa-mir-190a	0.338207
CID:60750	hsa-mir-515-2	0.337803
CID:3229	hsa-mir-513a-2	0.337776
CID:60750	hsa-mir-506	0.337556
CID:5288826	hsa-mir-212	0.337375
CID:3229	hsa-mir-513a-1	0.337027
CID:5757	hsa-mir-508	0.33702
CID:448537	hsa-mir-509-1	0.336982
CID:3229	hsa-mir-454	0.336761
CID:5757	hsa-mir-500a	0.336636
CID:3385	hsa-mir-660	0.336621
CID:3385	hsa-mir-548b	0.336595
CID:5757	hsa-mir-455	0.336526
CID:5757	hsa-mir-202	0.336442
CID:5288826	hsa-mir-194-2	0.336396
CID:5311	hsa-mir-514a-1	0.336236
CID:5311	hsa-mir-514a-2	0.336233
CID:448537	hsa-mir-329-1	0.336157
CID:3385	hsa-mir-527	0.336139
CID:451668	hsa-mir-495	0.336013
CID:5311	hsa-mir-548d-1	0.335859
CID:5311	hsa-mir-548d-2	0.335845
CID:5311	hsa-mir-615	0.335831
CID:451668	hsa-mir-302f	0.33583
CID:60750	hsa-mir-526a-2	0.335807
CID:60750	hsa-mir-320d-1	0.3356
CID:451668	hsa-mir-340	0.335265
CID:451668	hsa-mir-520b	0.335201
CID:3229	hsa-mir-362	0.33487
CID:60750	hsa-mir-455	0.334776
CID:451668	hsa-mir-520a	0.334761
CID:5757	hsa-mir-320c-1	0.334723
CID:451668	hsa-mir-422a	0.334615
CID:5288826	hsa-mir-139	0.33441
CID:3385	hsa-mir-922	0.334221
CID:5311	hsa-mir-519a-2	0.33405
CID:5757	hsa-mir-1224	0.334016
CID:5757	hsa-mir-671	0.333972
CID:3385	hsa-mir-612	0.333904
CID:3385	hsa-mir-548c	0.333895
CID:5288826	hsa-mir-98	0.333885
CID:5288826	hsa-mir-181d	0.333871
CID:36462	hsa-mir-146a	0.333841
CID:451668	hsa-mir-520c	0.333517
CID:451668	hsa-mir-519c	0.333464
CID:451668	hsa-mir-650	0.333426
CID:60750	hsa-mir-203a	0.33332
CID:60750	hsa-mir-1224	0.333182
CID:3385	hsa-mir-517c	0.333097
CID:3229	hsa-mir-198	0.333091
CID:5311	hsa-mir-630	0.332892
CID:5757	hsa-mir-515-1	0.332636
CID:3385	hsa-mir-767	0.332588
CID:448537	hsa-mir-329-2	0.332506
CID:60750	hsa-mir-503	0.332255
CID:60750	hsa-mir-519d	0.332211
CID:5288826	hsa-mir-130b	0.332147
CID:5757	hsa-mir-744	0.332087
CID:60750	hsa-mir-512-2	0.332073
CID:5757	hsa-mir-320d-1	0.332023
CID:60750	hsa-mir-216b	0.331972
CID:3229	hsa-mir-302f	0.331512
CID:3385	hsa-mir-518f	0.331414
CID:451668	hsa-mir-33a	0.331334
CID:60750	hsa-mir-671	0.331293
CID:3385	hsa-mir-525	0.331124
CID:3385	hsa-mir-655	0.331008
CID:3229	hsa-mir-495	0.330991
CID:448537	hsa-mir-652	0.330842
CID:448537	hsa-mir-410	0.330819
CID:5757	hsa-mir-504	0.330788
CID:5757	hsa-mir-515-2	0.330566
CID:448537	hsa-mir-510	0.330496
CID:5288826	hsa-mir-338	0.330256
CID:3229	hsa-mir-520b	0.330198
CID:60750	hsa-mir-520f	0.33005
CID:5757	hsa-mir-503	0.330006
CID:3385	hsa-mir-571	0.329953
CID:451668	hsa-mir-498	0.329857
CID:3229	hsa-mir-520a	0.329842
CID:5311	hsa-mir-33b	0.329808
CID:3229	hsa-mir-340	0.329312
CID:3385	hsa-mir-658	0.329167
CID:3229	hsa-mir-520c	0.329165
CID:36462	hsa-mir-17	0.329155
CID:5288826	hsa-mir-574	0.329092
CID:5757	hsa-mir-301b	0.32898
CID:5757	hsa-mir-421	0.328952
CID:5288826	hsa-mir-629	0.328898
CID:5757	hsa-mir-512-2	0.328688
CID:5757	hsa-mir-526a-2	0.328423
CID:448537	hsa-mir-1303	0.328374
CID:448537	hsa-mir-450b	0.328297
CID:60750	hsa-mir-504	0.328283
CID:3229	hsa-mir-519c	0.328275
CID:60750	hsa-mir-301b	0.328125
CID:448537	hsa-mir-646	0.327969
CID:5288826	hsa-mir-708	0.327861
CID:448537	hsa-mir-2110	0.327778
CID:60750	hsa-mir-492	0.327778
CID:5288826	hsa-mir-92b	0.327306
CID:5311	hsa-mir-329-1	0.327221
CID:3229	hsa-mir-33a	0.327138
CID:3385	hsa-mir-769	0.327067
CID:5757	hsa-mir-520f	0.327013
CID:60750	hsa-mir-433	0.327002
CID:3229	hsa-mir-422a	0.326977
CID:3229	hsa-mir-650	0.326937
CID:451668	hsa-mir-493	0.32686
CID:5757	hsa-mir-519d	0.326753
CID:3385	hsa-mir-511-2	0.326604
CID:5311	hsa-mir-509-1	0.326445
CID:448537	hsa-mir-524	0.326271
CID:36462	hsa-mir-221	0.32627
CID:3229	hsa-mir-498	0.326239
CID:448537	hsa-mir-320e	0.326168
CID:448537	hsa-mir-1249	0.325964
CID:5757	hsa-mir-433	0.325859
CID:451668	hsa-mir-485	0.325758
CID:3385	hsa-mir-577	0.325669
CID:448537	hsa-mir-325	0.325392
CID:60750	hsa-mir-320b-1	0.325205
CID:60750	hsa-mir-320b-2	0.325192
CID:5288826	hsa-mir-542	0.324981
CID:3385	hsa-mir-605	0.324959
CID:60750	hsa-mir-519e	0.324502
CID:36462	hsa-mir-126	0.32444
CID:5311	hsa-mir-329-2	0.323741
CID:3385	hsa-mir-1231	0.323736
CID:448537	hsa-mir-297	0.323724
CID:3229	hsa-mir-485	0.323534
CID:3385	hsa-mir-1245b	0.323322
CID:5757	hsa-mir-492	0.323188
CID:448537	hsa-mir-520g	0.323074
CID:3229	hsa-mir-493	0.322831
CID:3385	hsa-mir-376b	0.32281
CID:448537	hsa-mir-507	0.322774
CID:448537	hsa-mir-411	0.322754
CID:3385	hsa-mir-570	0.322702
CID:5311	hsa-mir-657	0.322444
CID:3385	hsa-mir-718	0.32234
CID:3385	hsa-mir-1245a	0.322334
CID:5311	hsa-mir-652	0.322325
CID:36462	hsa-let-7c	0.322247
CID:448537	hsa-mir-1275	0.321723
CID:3385	hsa-mir-4257	0.321715
CID:5311	hsa-mir-510	0.321698
CID:451668	hsa-mir-487b	0.321679
CID:5288826	hsa-mir-424	0.321612
CID:451668	hsa-mir-488	0.321572
CID:451668	hsa-mir-346	0.32148
CID:451668	hsa-mir-217	0.32138
CID:3385	hsa-mir-611	0.321306
CID:36462	hsa-mir-16-1	0.321214
CID:60750	hsa-mir-489	0.32112
CID:448537	hsa-mir-519b	0.321057
CID:5757	hsa-mir-885	0.320943
CID:5288826	hsa-mir-144	0.320784
CID:5288826	hsa-mir-181c	0.320404
CID:3385	hsa-mir-2355	0.320001
CID:5311	hsa-mir-410	0.319904
CID:5311	hsa-mir-450b	0.319891
CID:5288826	hsa-mir-625	0.319714
CID:451668	hsa-mir-323a	0.319581
CID:5311	hsa-mir-1303	0.319564
CID:451668	hsa-mir-501	0.319367
CID:3385	hsa-mir-603	0.319311
CID:5757	hsa-mir-484	0.319236
CID:5311	hsa-mir-2110	0.319019
CID:448537	hsa-mir-575	0.319016
CID:3385	hsa-mir-449c	0.318816
CID:5288826	hsa-mir-663a	0.318773
CID:5757	hsa-mir-489	0.318765
CID:5311	hsa-mir-646	0.318762
CID:3385	hsa-mir-1179	0.318551
CID:60750	hsa-mir-885	0.318453
CID:3385	hsa-mir-1301	0.318385
CID:5757	hsa-mir-320b-1	0.31838
CID:5757	hsa-mir-320b-2	0.318372
CID:448537	hsa-mir-1271	0.318067
CID:5311	hsa-mir-320e	0.317973
CID:448537	hsa-mir-1258	0.317941
CID:3385	hsa-mir-1260a	0.31794
CID:60750	hsa-mir-484	0.317852
CID:36462	hsa-mir-145	0.317598
CID:3229	hsa-mir-217	0.317585
CID:5311	hsa-mir-1249	0.317572
CID:5311	hsa-mir-524	0.317517
CID:448537	hsa-mir-518e	0.317505
CID:3229	hsa-mir-488	0.317344
CID:5288826	hsa-mir-372	0.317339
CID:36462	hsa-mir-20a	0.317152
CID:3229	hsa-mir-487b	0.317141
CID:60750	hsa-mir-208b	0.317068
CID:3385	hsa-mir-654	0.316985
CID:3229	hsa-mir-346	0.31682
CID:3385	hsa-mir-3163	0.316806
CID:5757	hsa-mir-208b	0.316678
CID:5288826	hsa-mir-219-1	0.316633
CID:5757	hsa-mir-519e	0.316618
CID:3385	hsa-mir-412	0.316528
CID:451668	hsa-mir-503	0.316528
CID:3385	hsa-mir-518a-2	0.316232
CID:448537	hsa-mir-544b	0.316106
CID:451668	hsa-mir-331	0.316077
CID:3229	hsa-mir-323a	0.31598
CID:451668	hsa-mir-532	0.315743
CID:3385	hsa-mir-521-1	0.315688
CID:3385	hsa-mir-521-2	0.315683
CID:60750	hsa-mir-513b	0.315518
CID:60750	hsa-mir-516b-1	0.315516
CID:448537	hsa-mir-640	0.315511
CID:36462	hsa-mir-16-2	0.315444
[truncated: 446,907+ more rows]
